# Supplementary material for: Anesthesia-induced hypothermia mediates decreased ARC gene and protein expression through ERK/MAPK inactivation
Source: PubMed Central journal article supplement — Sci Rep. 2013 Sep 18;3:1388. doi: 10.1038/srep01388 (PMC3965357; doi:10.1038/srep01388), 2013-09-18

## SUPPLEMENTARY INFORMATION

### **Anesthesia-induced hypothermia mediates decreased *ARC* gene and protein expression through ERK/MAPK inactivation**

Robert A. Whittington<sup>1\*</sup>, Alexis Bretteville<sup>2,3</sup>, László Virág<sup>1</sup>, Charles W. Emala<sup>1</sup>, Thomas O. Maurin<sup>4</sup>, François Marcouiller<sup>2,3</sup>, Carl Julien<sup>2,3</sup>, Franck R. Petry<sup>2,3</sup>, Noura B. El-Khoury<sup>2,3</sup>, Françoise Morin<sup>2,3</sup>, Jean Charron<sup>2,5</sup>, Emmanuel Planel<sup>2,3\*</sup>

<sup>1</sup>Department of Anesthesiology, Columbia University Medical Center, New York, NY, USA; <sup>2</sup>Département de Psychiatrie et Neurosciences, Université Laval, Québec, Canada; <sup>3</sup>Axe de Neurosciences, Centre de Recherche du Centre Hospitalier de Université Laval, Québec, Canada; <sup>4</sup>Department of Pathology, Columbia University Medical Center, New York, NY, USA; <sup>5</sup>Centre de Recherche en Cancérologie de l'Université Laval, L'Hôtel-Dieu de Québec, Québec, Canada.

**\*Correspondence and requests for materials should be addressed to R.A.W. (raw9@columbia.edu) or E. P. (emmanuel@planel.org)**

Figure S1

## A. Hypothermia

### 1. ARC

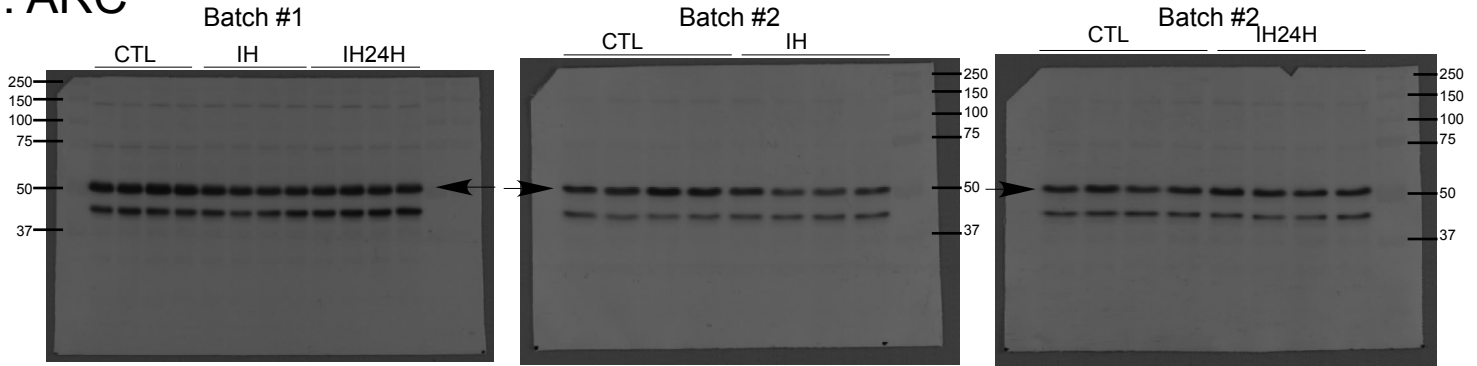

### 2. Actin

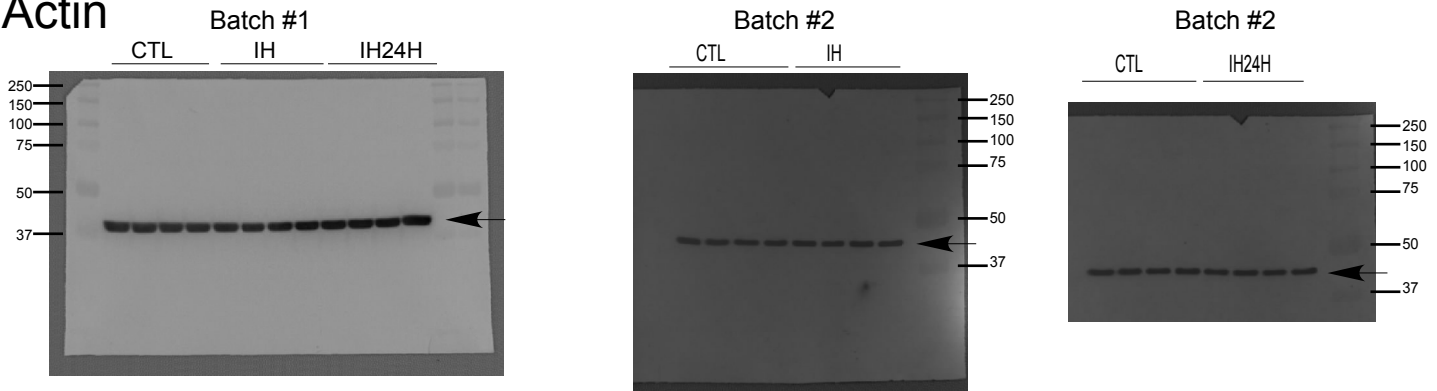

## B. Normothermia

### 1. ARC

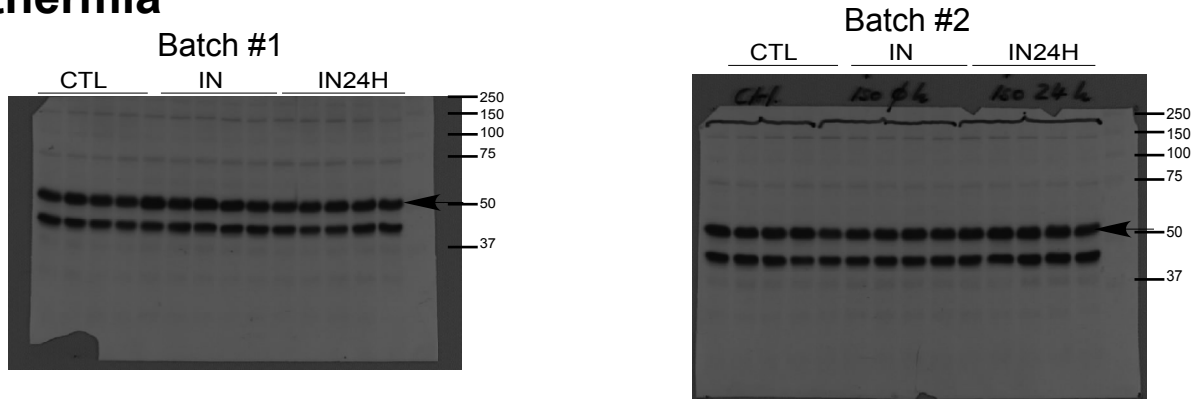

### 2. Actin

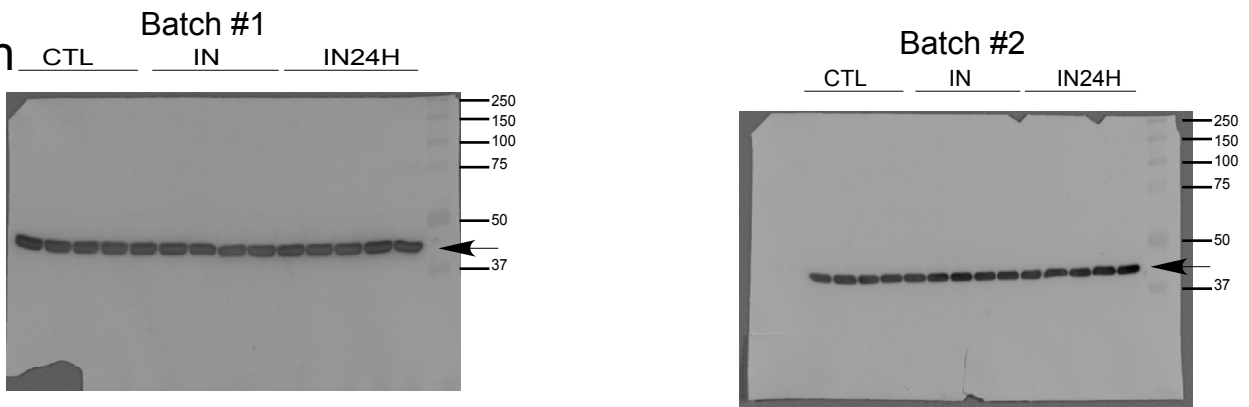

# Figure S2

## A. Hypothermia during anesthesia

### 1. Phospho-eEF2

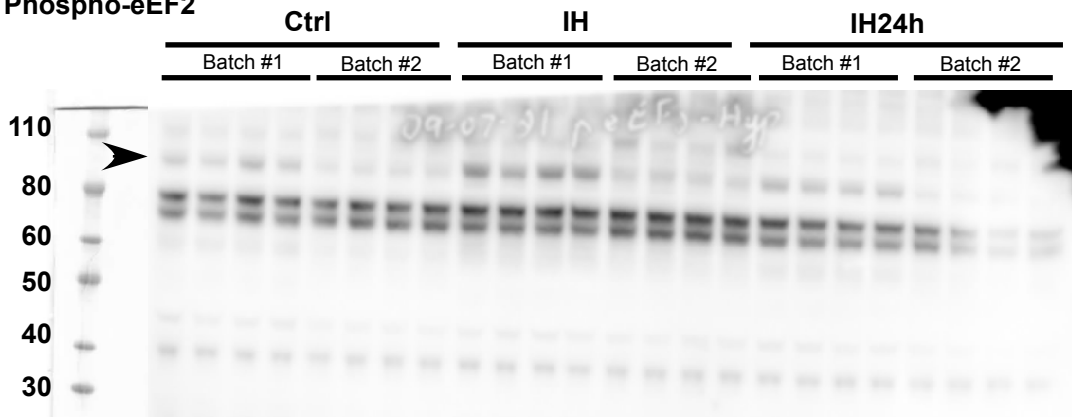

### 2. eEF2

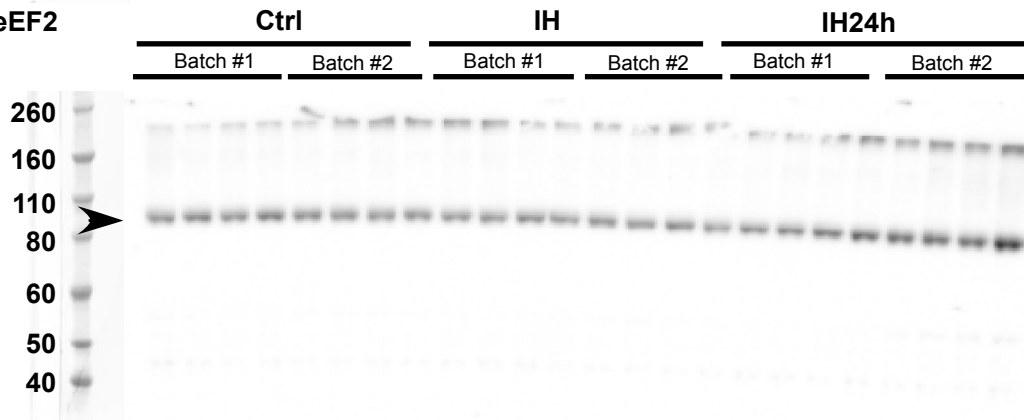

## B. Normothermia during anesthesia

### 1. Phospho-eEF2

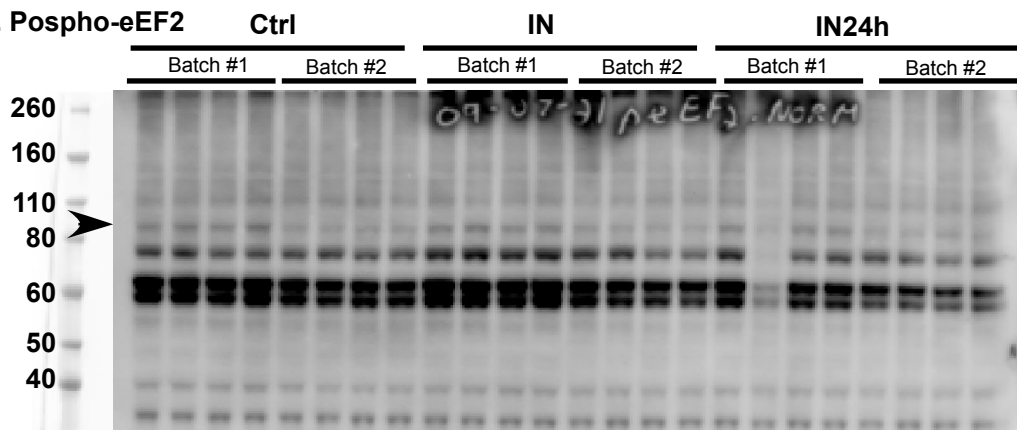

### 2. eEF2

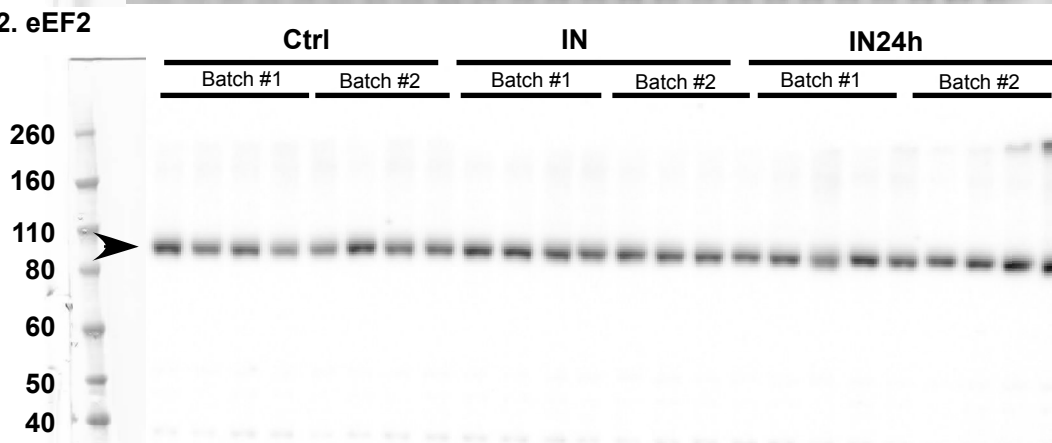

Figure S4

**A. Hypothermia during anesthesia**

**1. Phospho- ERK**

**2. ERK**

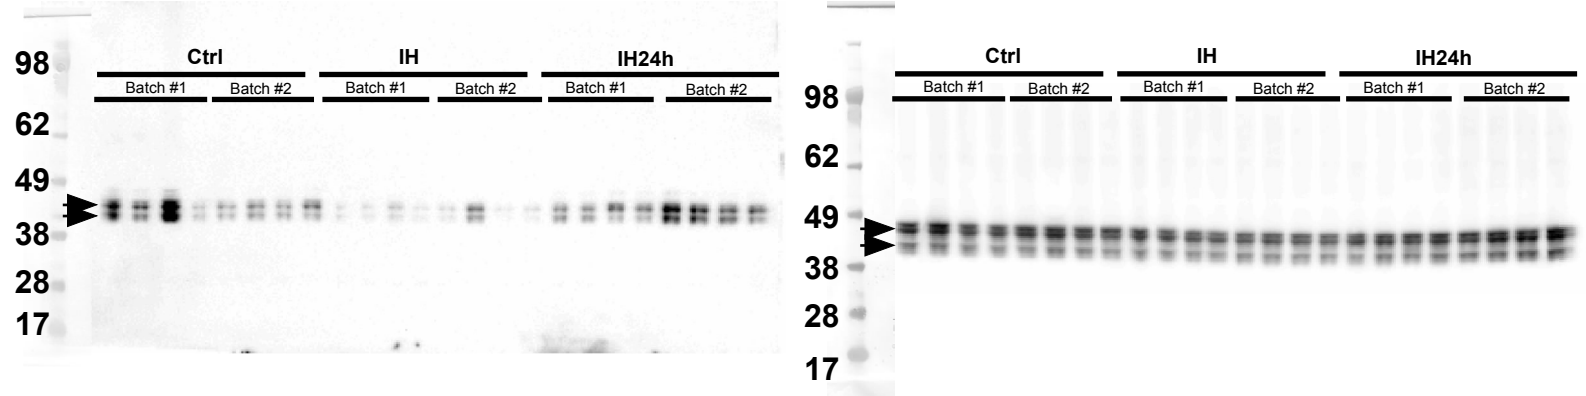

**B. Normothermia during anesthesia**

**1. Phospho- ERK**

**2. ERK**

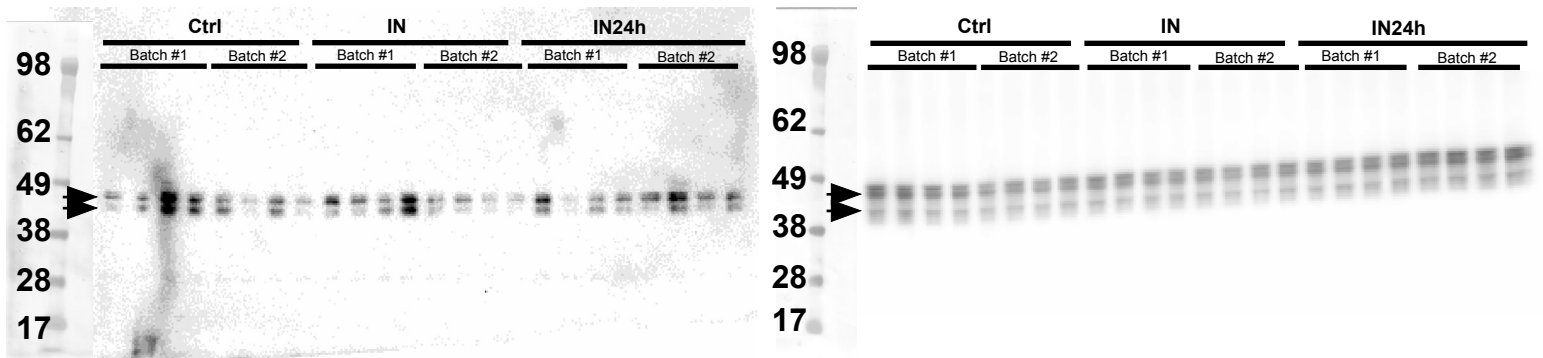

# Figure S5

## 1. ARC

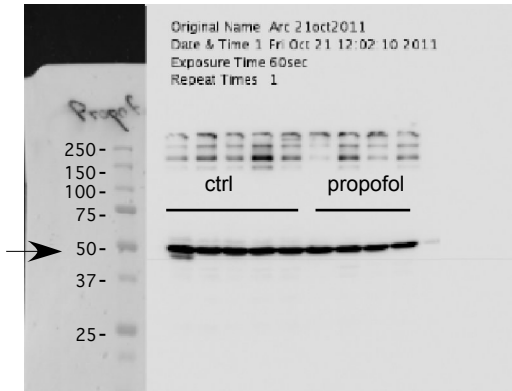

## 2. b-actin

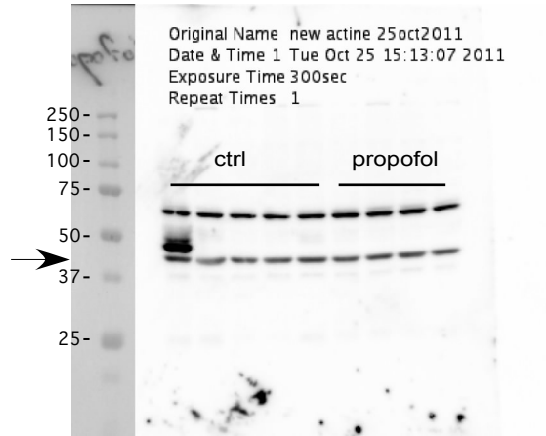

## 3. p-eEF2

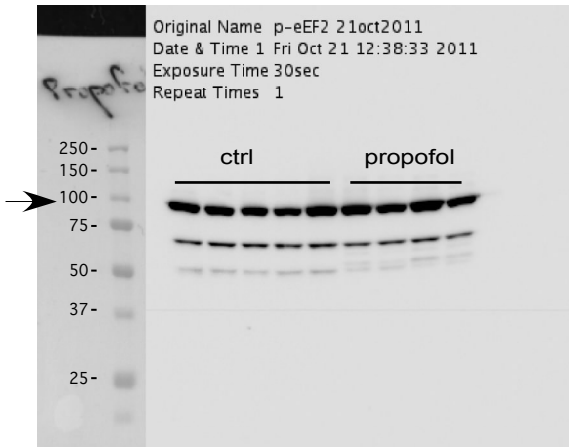

## 4. eEF2

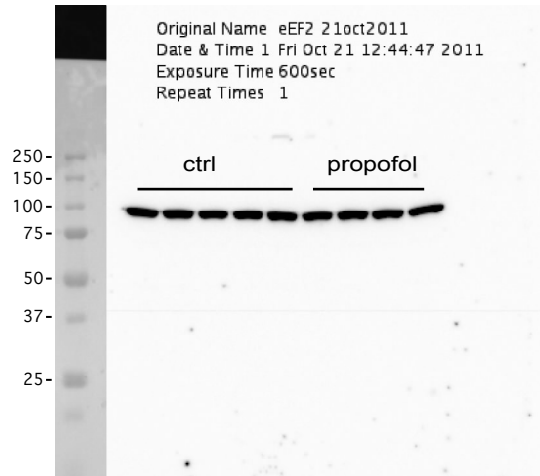

## 5. pERK

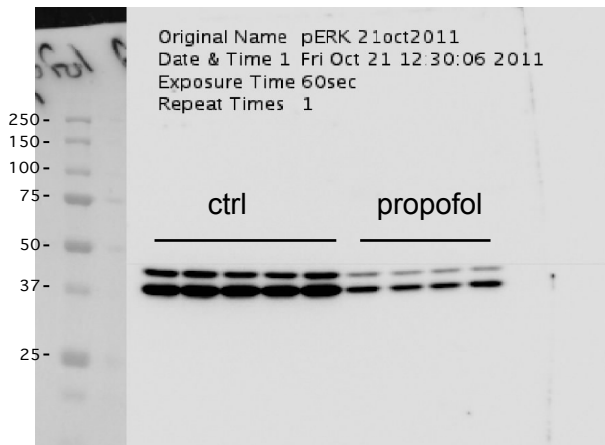

## 6. ERK

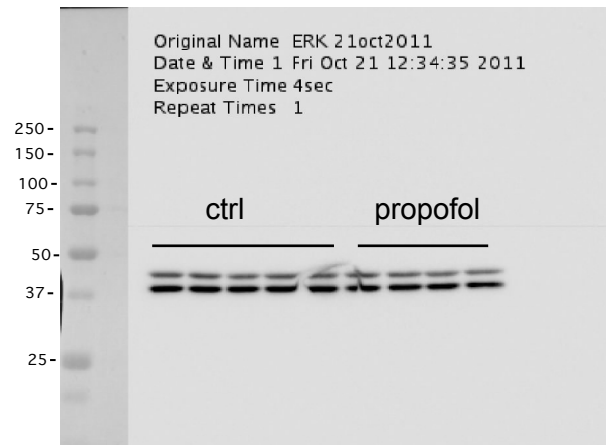

Figure S6

1.ARC

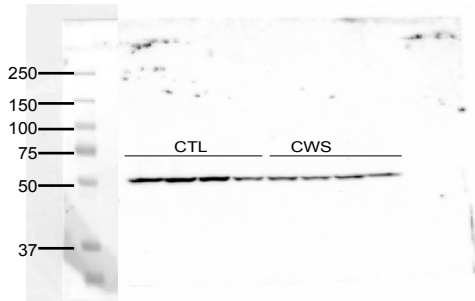

2.Actin

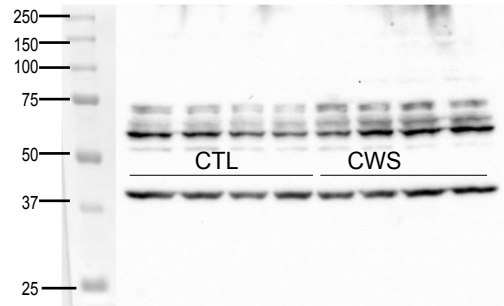

3.P-eEF2

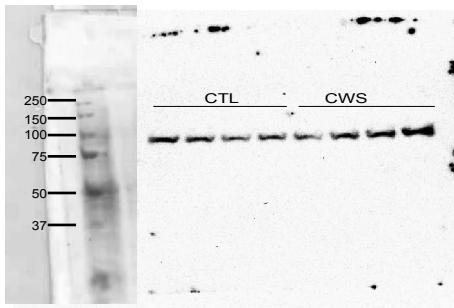

4.eEF2

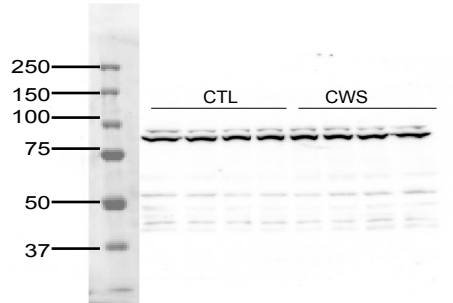

5.P-ERK

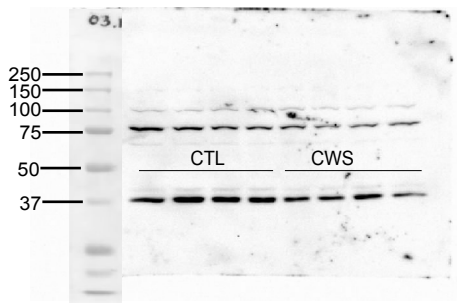

6.ERK

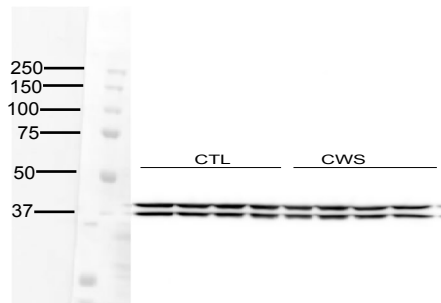

Figure S7a (Batch#1)

1. Arc

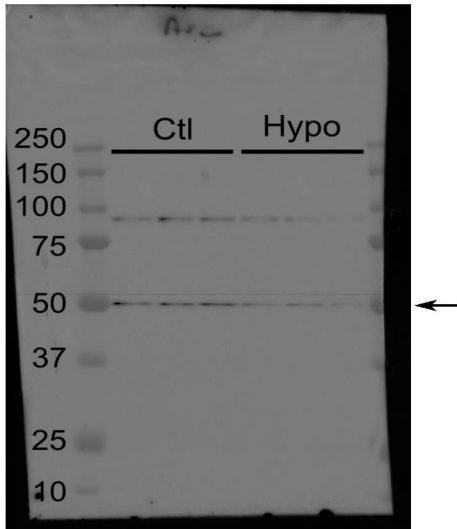

2. Actin

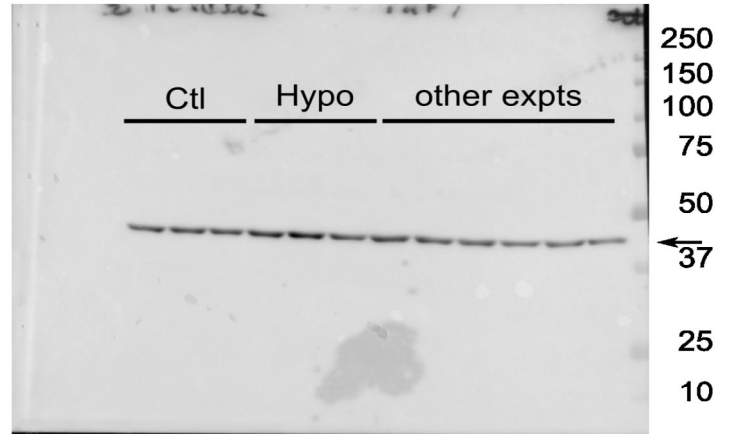

3. Phospho-eEF2

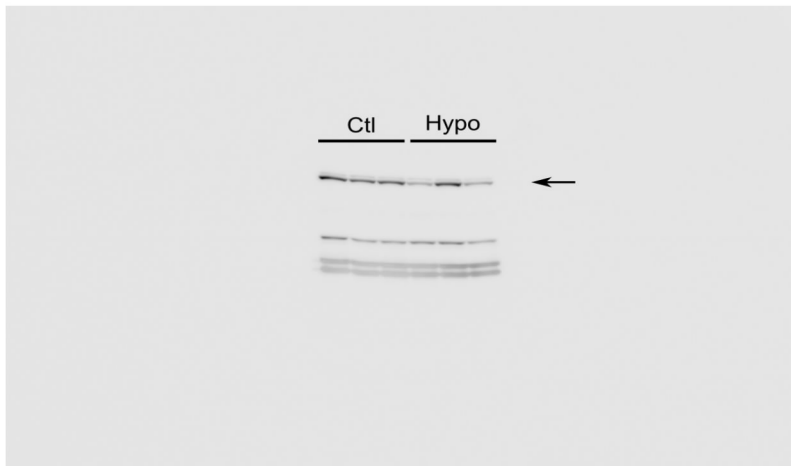

4. eEF2

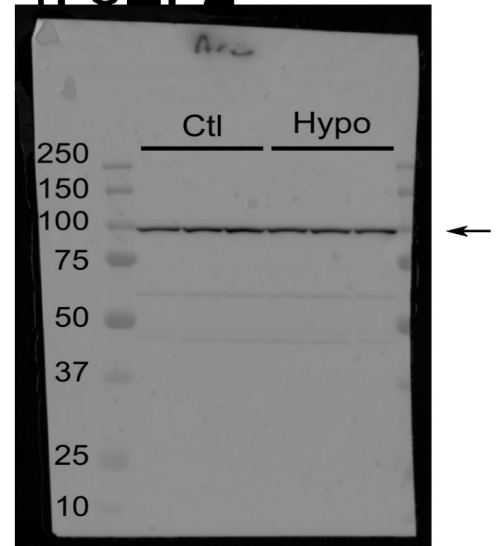

5. Phospho-ERK

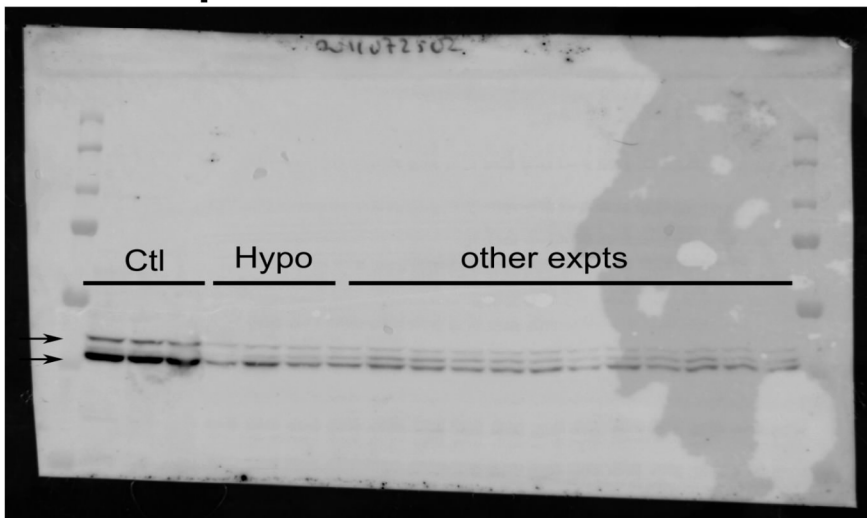

6. ERK

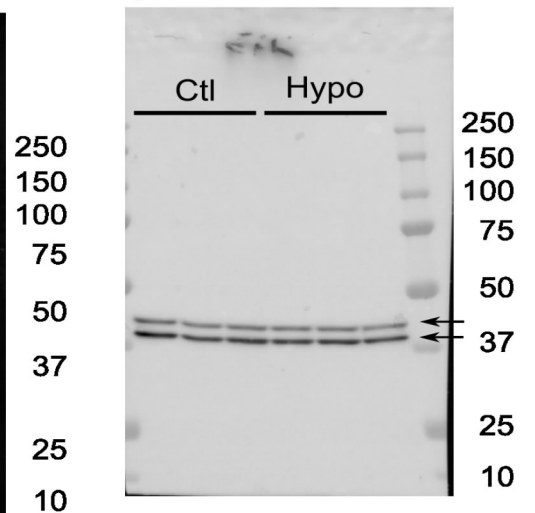

Figure S7b (Batch #2)

1. Arc

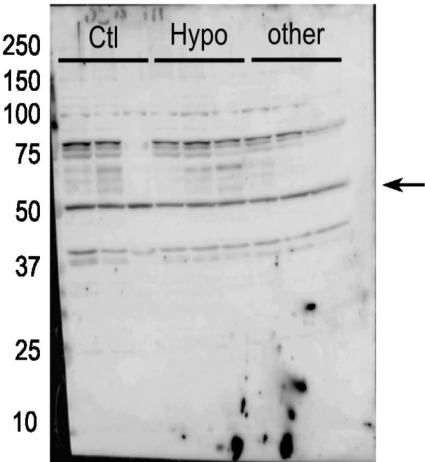

2. Actin

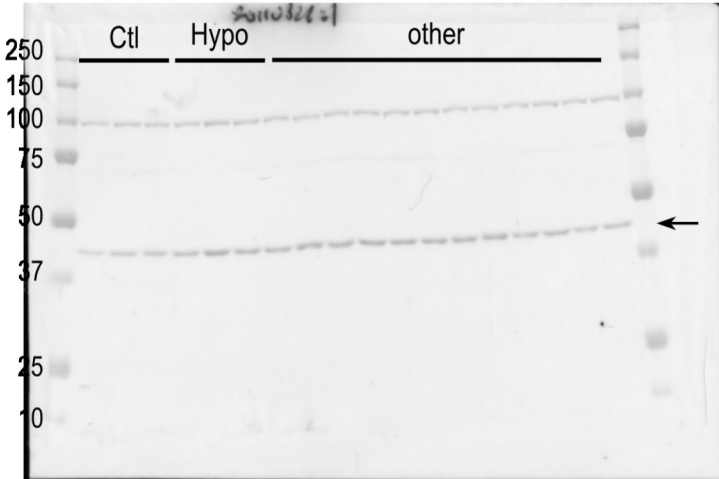

3. Phospho-eEF2

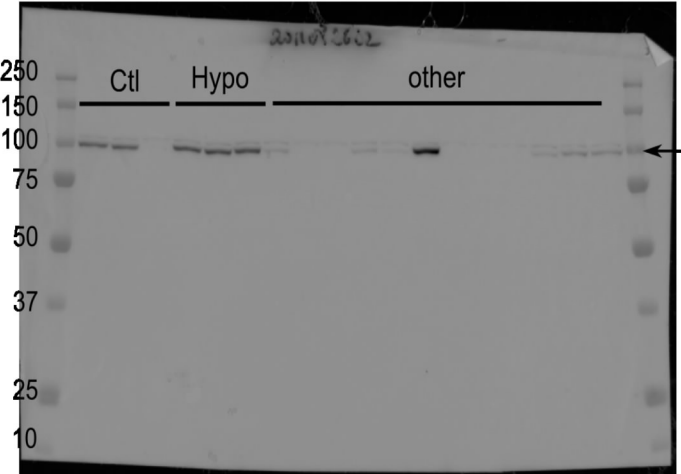

4. eEF2

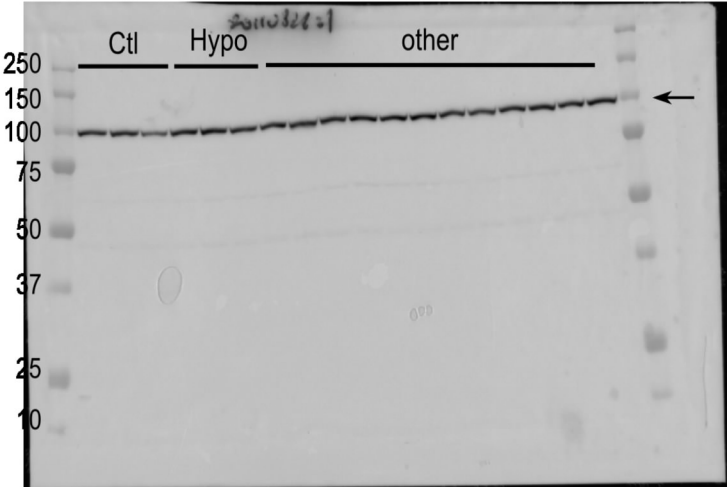

5. Phospho-ERK

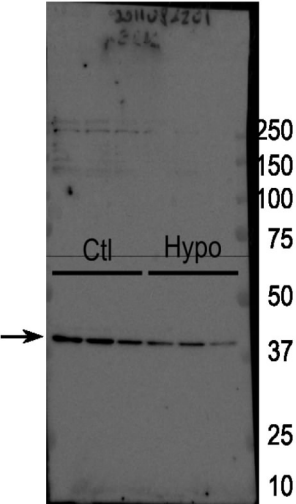

6. ERK

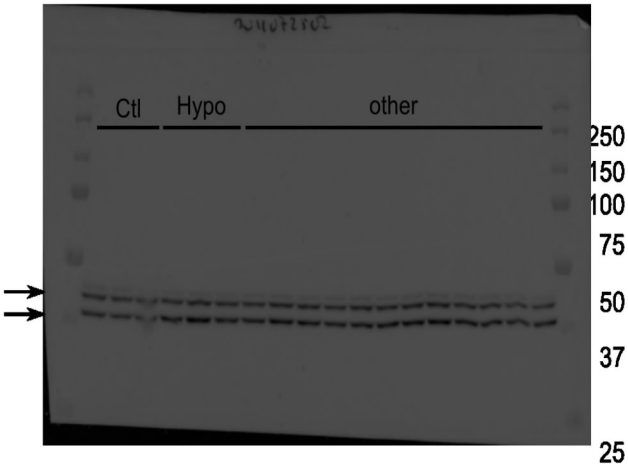



Figure S8

1. Arc

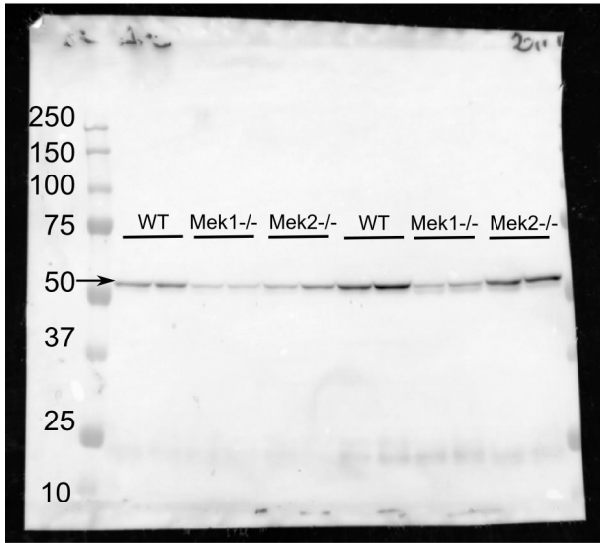

2. Actin

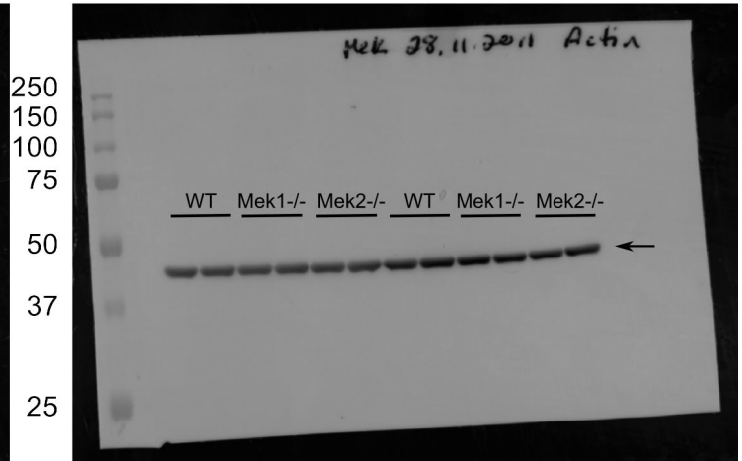

3. Phospho-eEF2

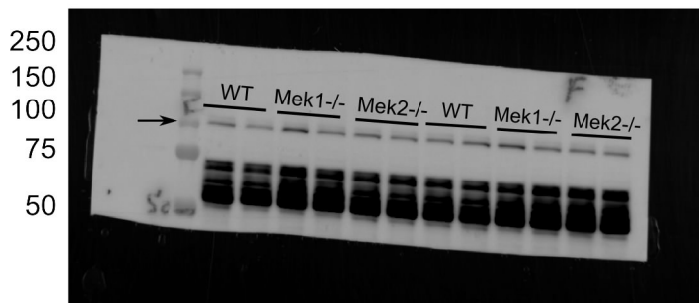

4. eEF2

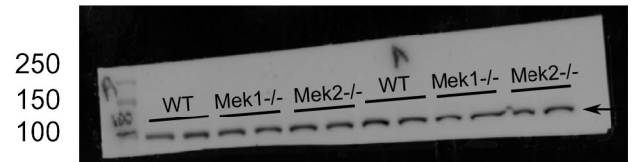

5. Phospho-ERK

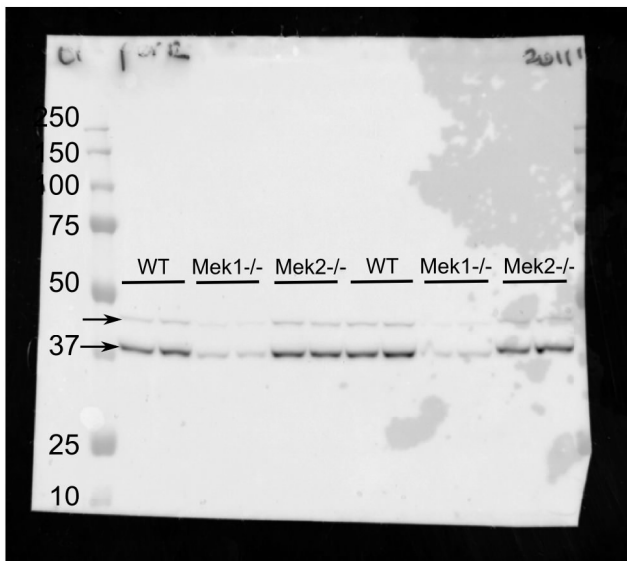

6. ERK

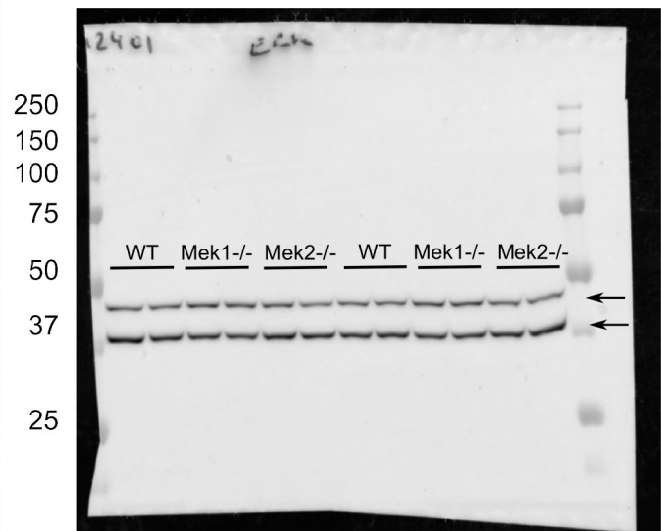

Supplement: srep01388-s1.pdf [file srep01388-s1.pdf]
